# Supplementary material for: Statin-induced muscle toxicity and susceptibility to malignant hyperthermia and other muscle diseases: a population-based case-control study including 1st and 2nd degree relatives
Source: Springer Nature journal article supplement (doi:10.1007/s00228-014-1776-9), 2014-11-01
Supplement: MOESM1 [file 228_2014_1776_MOESM1_ESM.docx]

**ICD codes selected for the study of the association between susceptibility to malignant hyperthermia and other muscle diseases**

G71.0 Muscular dystrophy

G71.0A Duchenne’s muscular dystrophy

G71.0B Becker’s muscular dystrophy (benign)

G71.0X Muscular dystrophy, not hereditary, unspecified

G71.1 Myotonic disorders

G71.2 Congenital myopathy

G71.3 Mitochondrial myopathy not classified elsewhere

G71.8 Other primary muscle disorder

G71.9 Unspecified primary muscle disorder

G72.0 Drug-induced myopathy

G72.8 Other specified myopathy

G72.9 Unspecified myopathy

R50.9 Unspecified hyperpyrexia

R82.1 Myoglobinuria

R95.9 Sudden infant death syndrome

T88.3 Malignant hyperthermia
